# Supplementary material for: Oxathiapiprolin, a Novel Chemical Inducer Activates the Plant Disease Resistance
Source: MDPI journal article supplement (doi:10.3390/ijms21041223), 2020-02-12
Supplement: s1 [file s1]

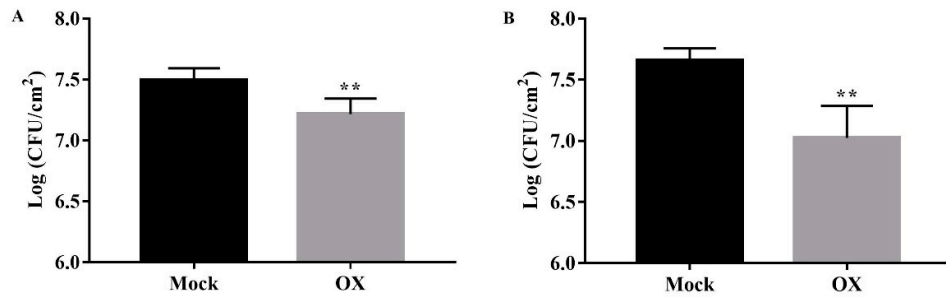

**Figure S1: OX activated the plant disease resistance against the *Pst* DC3000 infection in tobacco (A) and tomato (B) plants.** The tobacco or tomato plants were sprayed with OX (40 µg/ml) or mock (water with DMSO). The leaves were infiltrated with the *Pst* DC3000 ( $1 \times 10^5$  CFU/ml,  $OD_{600} = 0.0002$ ) using a 1 ml syringe at two days post the spray treatment. Three days after the pathogen inoculation, the bacterial growth was quantified by the plate assay. Significant differences between the OX-treated plants and the mock were indicated by the asterisks determined from the Student's t test ( $P < 0.05$ ). Results shown (means  $\pm$  SD) are from one of the three independent repeats with the consistent results.

Table S1 Primers used for qPCR in this study

| Gene           | Forward primer          | Reverse primer          |
|----------------|-------------------------|-------------------------|
| <i>PR1</i>     | TTCTTCCCTCGAAAGCTCAA    | AAGGCCACCAGAGTGTATG     |
| <i>PR2</i>     | CATCCTCGACGTTCCCAGTT    | TGTCGGCCTCCGTTTGA       |
| <i>PR5</i>     | AACGGCGGCGGAGTTC        | GCCGCCATCGCCTACTAGA     |
| <i>PDF 1.2</i> | GTTTGC GGAAACAGTAATGC   | CACACGATTTAGCACCAAAGA   |
| <i>RBOHD</i>   | AGCTTCACAATTATTGC ACGAG | TCTCCAGTTAGGTTTA GCGAAG |
| <i>ABI4</i>    | CCGCTTCTTCTCCTTCCAC     | GAGGGAGGAGAGGTCTTAGGG   |
| <i>ABA2</i>    | ACTCGCTTTGGCTCATTTGCC   | ACCGTCAGTTCCACCCCTTT    |
| <i>ACTIN</i>   | AGTGGTCGTACAACCGGTATTGT | GAGGAAGAGCATACCCCTCGTA  |
